# Supplementary material for: From Single DNA Molecule to Nanoparticles Formation: Mechanistic Basis for Monocationic Aromatic Drug-Induced DNA Frameworks
Source: Research Square preprint supplement (doi:10.21203/rs.3.rs-8436590/v1), 2026-01-06
Supplement: Supplementary file 1 [file 1619dde08cf42889d0c6c5b0.docx]

From Single DNA Molecule to Nanoparticles Formation: Mechanistic Basis for Monocationic Aromatic Drug-Induced DNA Frameworks

María Gabriela Villamizar-Sarmientoa,b,, Romina Muñoz Buzetac, Rodrigo Riverab, Francisco Melod, Juan M. Rusoe, Ignacio Moreno-Villosladaf, Mauricio Báezb*, Felipe Oyarzun-Ampuerog,h*

**Supplementary Information**

- 1. **PCR Protocols: dsDNA - 10 kbp**

PCR amplifications were done in thin-wall PCR tubes (200 µL of capacity) using a VeritiPro 96-Well ThermoCycler (Applied Biosystems, Thermo Fisher Scientific, Lithuania). PCR were done in a total volume of 25 µL with 0.5 µL of a DreamTaq™ DNA Polymerase (Thermo Fisher Scientific, Lithuania), 2.5 µL of DreamTaq Buffer, 0.625 µL of dNTPs (Invitrogen™, Thermo Fisher Scientific, Lithuania), 1.5 µL DNA Fago Lambda λ template, 0.5 µL oligonucleotide forward primer (Bio - TTA AGT CGC TTG AAA TTG CTA TAA GCA GAG) and 0.5 µL oligonucleotide reverse primer (Dig - TGA TCA ACT GGC TTT CCA AAC TCG TAT TCG). The PCR cycles were 3 min, 93 °C (step 1), followed by 10 cycles of 15 s denaturation at 93 °C, 30 s annealing at 56 °C, and 8 min elongation at 68 °C (step 2), followed by 20 cycles of 15 s denaturation at 93 °C, 30 s annealing at 56 °C, and 8 min (+ 20 s/cycle) elongation at 68 °C (step 3). The reaction was terminated by a 7 min elongation at 68 °C (step 4).

**Figure S1.** Force-distance curves of a 10 kpb dsDNA molecule in the absence (black line) and presence of increasing concentrations of PPL (blue line) (**A)** 1mM, (**B)** 1.5 mM, (**C**) 2 mM (**D**) 2.5 mM, (**E**) 3mM and (**F**) 4 mM. Continuous lines represent the extension phase, while dashed lines correspond to the relaxation phase.

**Figure S2**. Representative force-distance curve of 10 kbp dsDNA in the absence (black line), and in the presence of 4 mM (red line) and 10 mM (blue line) PPL. **Molecule 1**: The force-distance measurement initiates at 0 pN. Multiple stick-release events are observed, and the tether ruptures at forces below 60 pN. The apparent contour length (*Lc*) exceeds that of native dsDNA (without PPL) but remains shorter than the maximum extension observed in the presence of 4 mM PPL. **Molecule 2**: The force-distance measurement initiates at 0 pN. A single stick–release transition is detected during extension. Six consecutive stretch–relaxation cycles were performed, exhibiting reversible mechanical behavior. The apparent *Lc* is greater than that of native dsDNA but shorter than that obtained with 4 mM PPL. **Molecule 3**: The force increases from 0 to 40 pN prior to the onset of extension, likely due to PPL-induced conformational constraints. Several stick-release events are observed during extension. A single stretch-relaxation cycle was completed, showing irreversible mechanical behavior. The apparent *Lc* is shorter than both native dsDNA and dsDNA fully extended in 4 mM PPL.
